# Supplementary material for: Assessing strategies to target screening for advanced liver fibrosis among overweight and obese patients
Source: PubMed Central journal article supplement (PMC9400455; doi:10.20517/mtod.2022.08), 2022-07-18
Supplement: NIHMS1824412-supplement-Supplementary_material.pdf [file NIHMS1824412-supplement-Supplementary_material.pdf]

**Supplemental Table 1. Patients' characteristics based on the presence of NAFLD**

|                                             | <b>Patients<br/>without<br/>NAFLD<br/>(<i>n</i> = 92)</b> | <b>Patients<br/>with<br/>NAFLD<br/>(<i>n</i> = 183)</b> | <b><i>P</i> value</b> |
|---------------------------------------------|-----------------------------------------------------------|---------------------------------------------------------|-----------------------|
| <b>Age, years</b>                           | 58 ± 11                                                   | 52 ± 11                                                 | < 0.001               |
| <b>Gender, male/female %</b>                | 73%/27%                                                   | 74%/26%                                                 | 0.79                  |
| <b>Ethnicity</b>                            |                                                           |                                                         | < 0.001               |
| <b>Caucasian, %</b>                         | 50%                                                       | 44%                                                     |                       |
| <b>Hispanic, %</b>                          | 23%                                                       | 46%                                                     |                       |
| <b>African-American, %</b>                  | 27%                                                       | 8%                                                      |                       |
| <b>Other, %</b>                             | 0%                                                        | 2%                                                      |                       |
| <b>Weight, kg</b>                           | 98 ± 18                                                   | 100 ± 16                                                | 0.30                  |
| <b>Body mass index, kg/m<sup>2</sup></b>    | 33.2 ± 5.3                                                | 34.3 ± 4.8                                              | 0.08                  |
| <b>Presence of diabetes, %</b>              | 64%                                                       | 60%                                                     | 0.52                  |
| <b>Diabetes medications</b>                 |                                                           |                                                         |                       |
| <b>Metformin, %</b>                         | 49%                                                       | 43%                                                     | 0.34                  |
| <b>Sulfonylureas, %</b>                     | 26%                                                       | 25%                                                     | 0.82                  |
| <b>Insulin, %</b>                           | 15%                                                       | 14%                                                     | 0.73                  |
| <b>Statin use, %</b>                        | 60%                                                       | 57%                                                     | 0.67                  |
| <b>Blood pressure medication use, %</b>     | 74%                                                       | 68%                                                     | 0.31                  |
| <b>A1c, %</b>                               | 6.5 ± 1.2                                                 | 6.5 ± 1.1                                               | 0.72                  |
| <b>Fasting plasma glucose, mg/ml</b>        | 125 ± 39                                                  | 128 ± 34                                                | 0.49                  |
| <b>Intrahepatic triglyceride content, %</b> | 3 ± 1                                                     | 16 ± 9                                                  | < 0.001               |
| <b>Aspartate aminotransferase, U/L</b>      | 23 ± 12                                                   | 41 ± 26                                                 | < 0.001               |
| <b>Alanine aminotransferase, U/L</b>        | 23 ± 18                                                   | 58 ± 37                                                 | < 0.001               |
